# Supplementary material for: Influence of the ligand frameworks on the coordination environment and properties of new phenylmercury(ii) β-oxodithioester complexes
Source: Royal Society of Chemistry journal article supplement (doi:10.1039/c4dt03816a), 2015-01-01

### Supplementary Information

#### **Influence of the ligand frameworks on the coordination environment and properties of new phenylmercury(II) $\beta$ -oxodithioester complexes.**

Gunjan Rajput<sup>a</sup>, Manoj Kumar Yadav<sup>a</sup>, Michael G. B. Drew<sup>b</sup> and Nanhai Singh<sup>a\*</sup>

<sup>a</sup>Department of Chemistry, Faculty of Science, Banaras Hindu University,

Varanasi 221005, India. Fax: +91-542-2386127

E-mail: [nsingh@bhu.ac.in](mailto:nsingh@bhu.ac.in), [nsinghbhu@gmail.com](mailto:nsinghbhu@gmail.com)

<sup>b</sup>Department of Chemistry, University of Reading, Whiteknights, Reading, RG6 6AD (U.K.)

#### **Contents**

**S1: Figure S1.** Simulated and experimental PXRD patterns of **1-3**

**S2: Table S2.** Selected non-conventional hydrogen bonding interactions and their parameters

**S3: Table S3.** Selected Wiberg Bond Orders for **1** and **3**

**S4: Table S4:** Charge distribution given by Natural Bond Orbital Analysis for **1** and **3**

**S5: Figure S5:** Solid phase absorption spectra of **1-3**

**S6: Figure S6:** Solution phase excitation and emission spectra of **1-3**

**S7: Figure S7:** Solid phase emission spectra of **1-3**

**S8.** Generalized methodology for the synthesis of ligands **HL1-HL3**

**S9.** Generalized methodology for the synthesis of complexes **1-3**

**S1: Figure S1.** Simulated (in red, generated from single crystal data) and experimental (in black) PXRD patterns of **1-3**

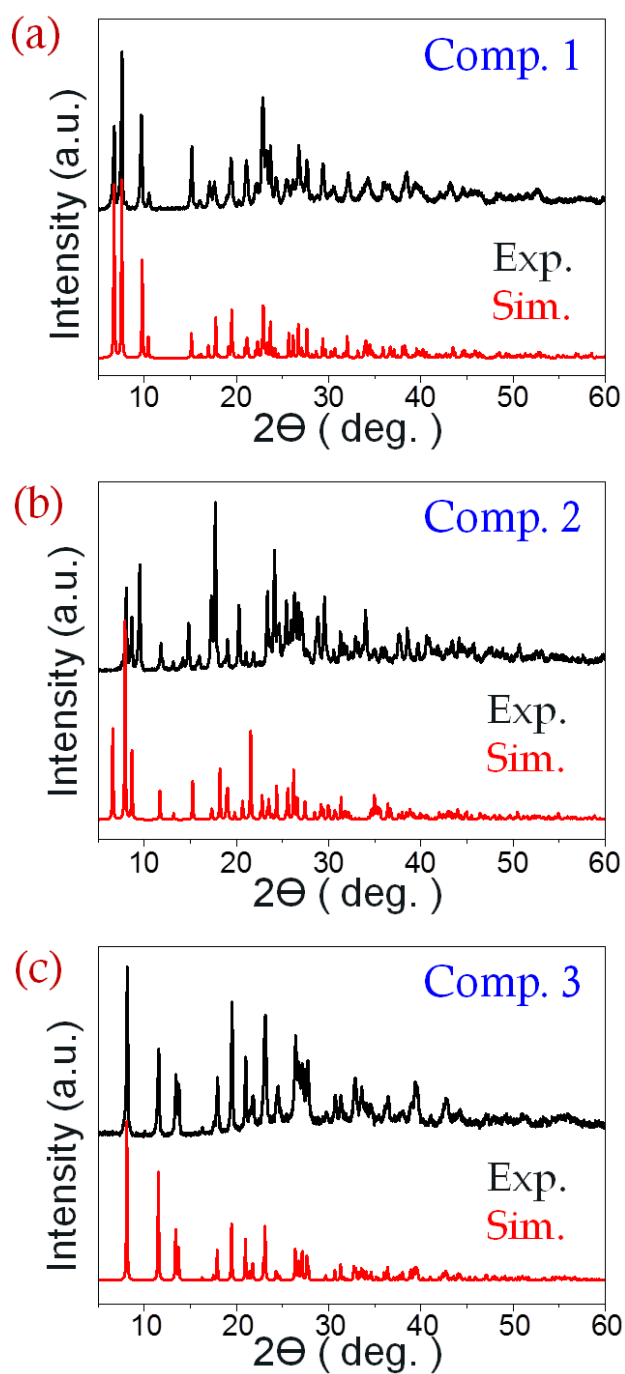

**S2: Table S2.** Selected non-conventional hydrogen bonding interactions and their parameters

| Compound | D-H $\cdots$ A                  | d(H $\cdots$ A) (Å) | d(D $\cdots$ A) (Å) | $\angle$ D-H $\cdots$ A ( $^\circ$ ) |
|----------|---------------------------------|---------------------|---------------------|--------------------------------------|
| <b>1</b> | C-H26 $\cdots$ S13 <sup>a</sup> | 2.97                | 3.86(3)             | 160                                  |

|                                                                                                                             |                                          |              |         |     |
|-----------------------------------------------------------------------------------------------------------------------------|------------------------------------------|--------------|---------|-----|
|                                                                                                                             | C–H28B···O27 <sup>b</sup>                | 2.59         | 3.53(3) | 165 |
| <b>3</b>                                                                                                                    | C–H15···O17 <sup>c</sup>                 | 2.65         | 3.53(5) | 159 |
|                                                                                                                             | C–H24···S11 <sup>d</sup>                 | 3.00         | 3.63(3) | 127 |
| Symmetry code: <sup>a</sup> 1-x,-1/2+y,-z; <sup>b</sup> 1-x,-1/2+y,1-z; <sup>c</sup> x,-y,-1/2+z ; <sup>d</sup> -1+x,y,-1+z |                                          |              |         |     |
| Other weak interactions                                                                                                     |                                          |              |         |     |
| Compound                                                                                                                    | Interaction Type                         | Distance (Å) |         |     |
| <b>2</b>                                                                                                                    | Br24···π <sup>a</sup> (-x, 1.5+y, 0.5-z) | 3.65         |         |     |
|                                                                                                                             | S13···S13(1-x, -y, 1-z)                  | 3.554(4)     |         |     |

<sup>a</sup> Ring C41···C46 inclusive

**S3: Table S3.** Selected Wiberg Bond Orders for **1** and **3**

| Compound       | P(Hg-X) | P (Hg-S)             | P(Hg···S)            | P(Hg-C)              |
|----------------|---------|----------------------|----------------------|----------------------|
| <b>1</b> (X=O) | 0.117   | 0.405                | ---                  | 0.665                |
| <b>3</b> (X=N) | 0.093   | 0.496(A)<br>0.486(B) | 0.089(A)<br>0.092(B) | 0.473(A)<br>0.491(B) |

**S4: Table S4.** Charge distribution given by Natural Bond Orbital Analysis for **1** and **3**

| Charge on atoms | <b>1</b> (X=O) | <b>3</b> (X=N)       |
|-----------------|----------------|----------------------|
| Hg              | 1.077          | 0.948(A)<br>0.991(B) |
| X               | -0.718         | -0.511               |
| S(11)           | -0.271         | -0.211(A)            |

|                                                  |        |                      |
|--------------------------------------------------|--------|----------------------|
|                                                  |        | -0.187(B)            |
| S(13)                                            | 0.300  | 0.299(A)<br>0.283(B) |
| X <sup>#</sup>                                   | -0.535 | -0.457(B)            |
| # for O/N not involved in interaction with metal |        |                      |

**S5: Figure S5.** Excitation and emission spectra of **1-3** in CH<sub>2</sub>Cl<sub>2</sub> solution at room temperature showing  $\lambda_{em}^{max}$  at ~ 420 nm.

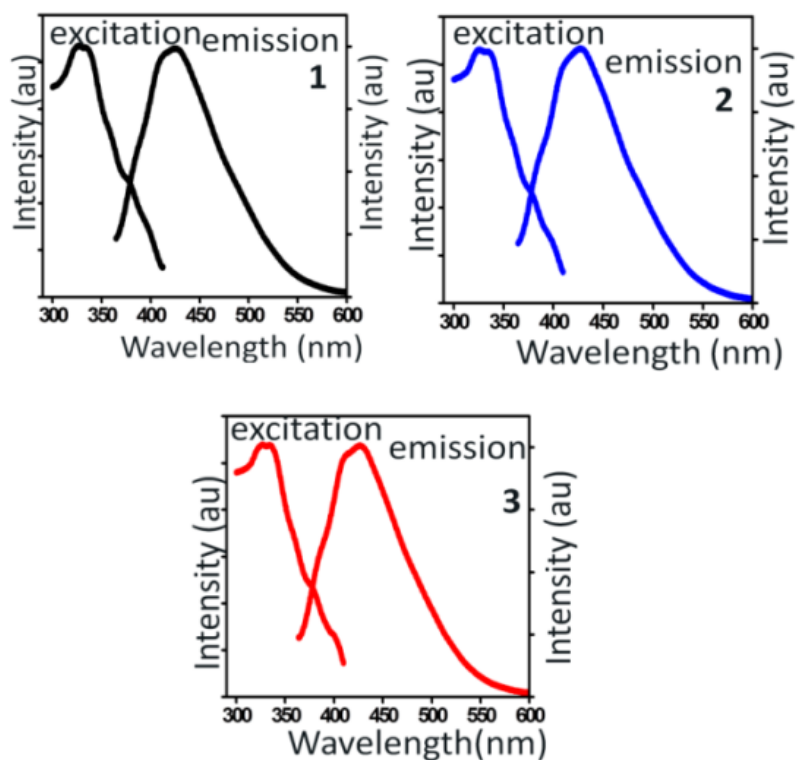

**S6: Figure S6.** Solid phase emission spectra of **1-3** at room temperature,  $\lambda_{em}^{max}$  at  $\sim 480$  nm.

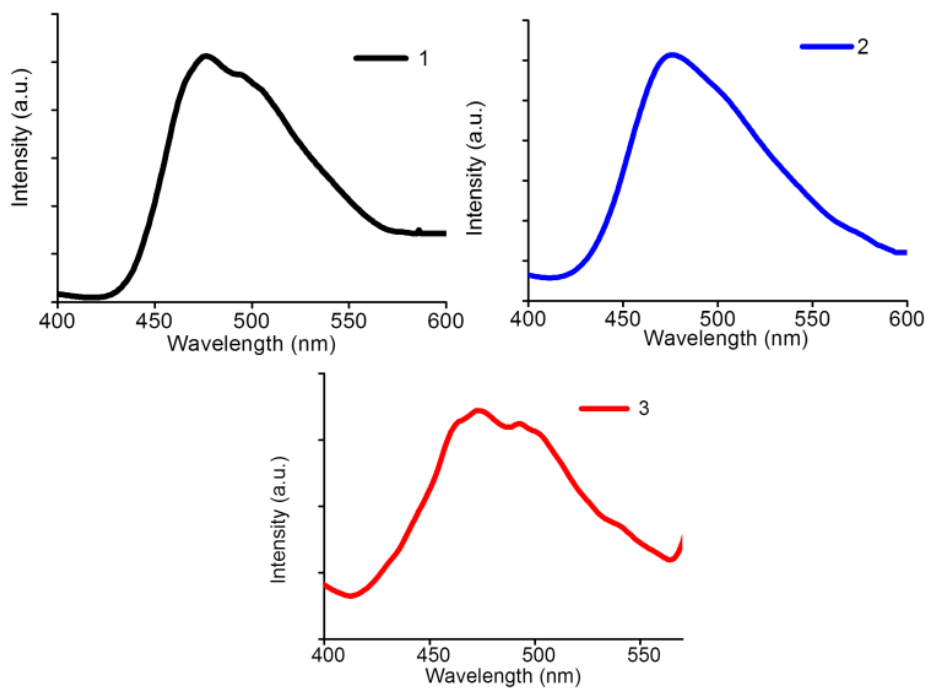

**S7: Figure S7.** Solid state absorption spectra of **1-3** in Nujol.

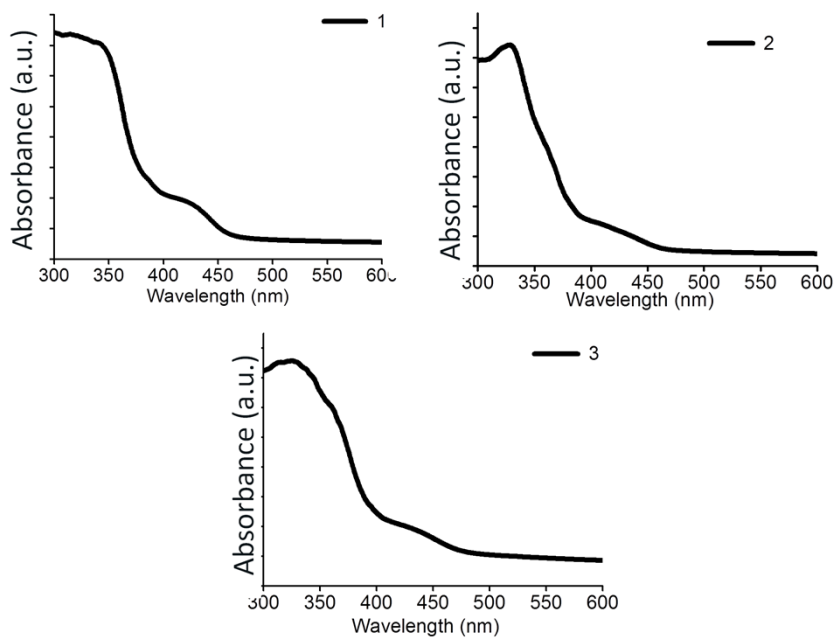

**S8. Scheme S8.** Generalized methodology for the synthesis of ligands HL1-HL3

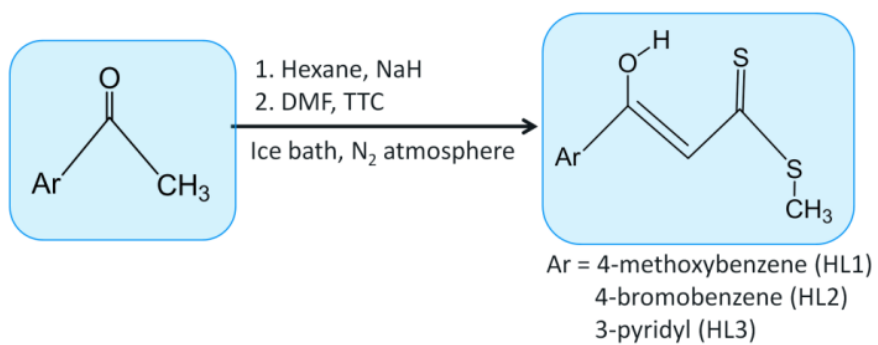

**S9. Scheme S9.** Generalized methodology for the synthesis of complexes 1-3

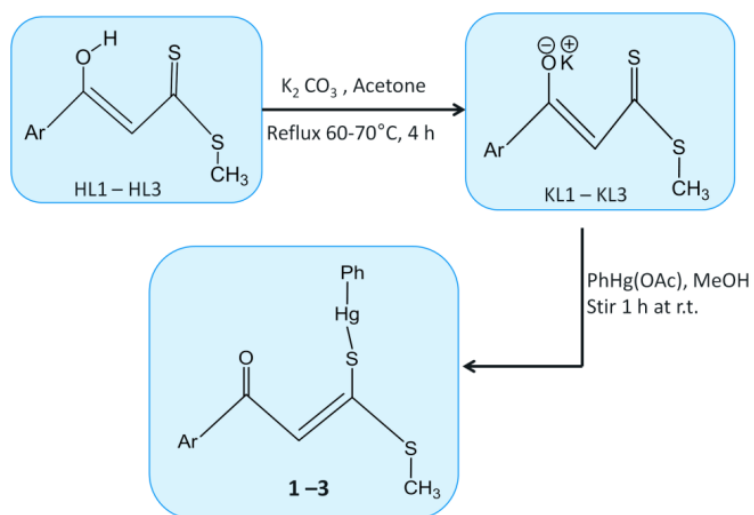

Supplement: c4dt03816a1.pdf [file c4dt03816a1.pdf]
